# Supplementary material for: Integrated Mineralogical, Metabolomic, and Gene Expression Analysis of the Phosphate- Solubilizing Mechanism of Pseudomonas sp. PSB-13
Source: Research Square preprint supplement (doi:10.21203/rs.3.rs-8305279/v1), 2025-12-19
Supplement: Supplementary file 1 [file 232737cca8071dd21403f8d8.docx]

**Integrated Mineralogical, Metabolomic, and Gene Expression Analysis of the Phosphate-Solubilizing Mechanism of *Pseudomonas* sp. PSB-13**

Qingyun Xu1, Youyou Zhao1 Chengxiao Hu1, Songwei Wu1, Qiling Tan1, Xuecheng Sun1,2,3*

1 Key Laboratory of Arable Land Conservation (Middle and Lower Reaches of Yangtze River), Ministry of Agriculture, Micro-elements Research Center, College of Resource and Environment, Huazhong Agricultural University, Wuhan, 430070, China

2 Shenzhen Institute of Nutrition and Health, Huazhong Agricultural University, Wuhan 430070, China

3 Shenzhen Branch, Guangdong Laboratory for Lingnan Modern Agriculture, Genome Analysis Laboratory of the Ministry of Agriculture, Agricultural Genomics Institute at Shenzhen, Chinese Academy of Agricultural Sciences, Shenzhen 518000, China

* Corresponding author. Xuecheng Sun, E-mail: [sxccn@mail.hzau.edu.cn](mailto:sxccn@mail.hzau.edu.cn)

**Materials and methods**

**Untargeted LC–MS metabolomic analysis**

The mobile phases consisted of 0.1% formic acid in water: acetonitrile (95:5, v/v) (solvent A) and 0.1% formic acid in acetonitrile: isopropanol: water (47.5:47.5, v/v) (solvent B). Positive ion mode separation gradient: 0-3 min, mobile phase B was increased from 0% to 20%; 3-4.5 min, mobile phase B was increased from 20% to 35%; 4.5-5 min, mobile phase B was increased from 35% to 100%; 5-6.3 min, mobile phase B was maintained at 100%; 6.3-6.4 min, mobile phase B was decreased from 100% to 0%; 6.4-8 min, mobile phase B was maintained at 0%. Separation gradient in negative ion mode: 0-1.5 min, mobile phase B rises from 0 to 5%; 1.5-2 min, mobile phase B rises from 5% to 10%; 2-4.5 min, mobile phase B rises from 10% to 30%; 4.5-5 min, mobile phase B rises from 30% to 100%; 5-6.3 min, mobile phase B linearly maintains 100%; 6.3-6.4 min, the mobile phase Bdecreased from 100% to 0%; 6.4-8 min, the mobile phase B was linearly maintained at 0%. The flow rate was 0.40 mL/min and the column temperature was 40℃.

MS conditions: The mass spectrometric data were collected using a Thermo UHPLC-Q Exactive HF-X Mass Spectrometer equipped with an electrospray ionization (ESI) source operating in positive mode and negative mode. The optimal conditions were set as followed: source temperature at 425℃ ; sheath gas flow rate at 50 arb;Aux gas flow rate at 13 arb; ion-spray voltage floating (ISVF) at-3500V in negative mode and 3500V in positive mode, respectively; Normalized 4. Data anlaysis collision energy, 20-40-60V rolling for MS/MS. Full MS resolution was 60000, and MS/MS resolution was 7500. Data acquisition was performed with the Data Dependent Acquisition (DDA) mode. The detection was carried out over a mass range of 70-1050 m/z.

Supplementary Table 1 Primer’s information of selected functional genes for RT-qPCR

| Gene | FORWARD (5' to 3') | REVERSE (5' to 3') |
| --- | --- | --- |
| *mdcA* | CTGATGGCGATGATGGCGATCC | CGATGGCGGCGGTGTTGAAG |
| *pyrE* | CGGTGAGTTGTCGGCAATCCAG | GCTTGAGCTGCGGATCGTCAG |
| *gal* | GCACACCGCCGCAAGGAC | TTCACCAACGCCATCGCTTCG |
| *ndpA* | CGGGTGGTGGCGTTGGTTTC | TGTAGGTCATTGGCGTGGTTTGC |
| *hutH* | AACACCTTGCTCAGTCACGCTTG | CGACCACCCGACGATGAATGC |
| *cysE* | CGAGGATGATGTGGTGATCTACGC | CAGACGTTGCCGCCGATGG |
| *gst* | GAGCGGACTTCCTCGTCATCAAC | GGCCTTCGGTCAGCACTTCAC |
| *gdhA* | CGAAACCTTCCTTGCCCGACTG | CGGAGGTCAGATAATGCGGATTGG |
| *hidD* | CGCCGACTCAACGCTGCTG | CCGCATCGCCACGCTCAC |
| *phoB* | GCACCTCCGGCATCGAATTGG | CTTGTTGTCCTCTTCGCCCTTGG |
| *clsC* | GCTGATGACCTACACCACAAACCC | TCGCCGTCTGACAGGACCTTG |
| *pyrB* | GCGAACTGTTGACGGAGATCCTC | GTCGTGCGGGTGCGTGTG |
| *16S* | ACTCCTACGGGAGGCAGCA | GGACTACHVGGGTWTCTAAT |
| *rpoD* | ATGTCCGGAAAAGCGCAACA | TCACTCGTCGAGGAAGGAGC |

Supplementary Table 2 EDS analysis of Ca-P surface at different times

| Content (%) | 12h | 24h | 48h | 72h |
| --- | --- | --- | --- | --- |
| P | 15.66 | 15.16 | 18.31 | 18.86 |
| Ca | 28.98 | 26.11 | 38.9 | 30.96 |
| O | 55.36 | 58.73 | 42.79 | 50.18 |

Supplementary Table 3 EDS analysis of Al-P surface at different times

| Content (%) | 12h | 24h | 48h | 72h |
| --- | --- | --- | --- | --- |
| Al | 16.23 | 17.37 | 16.54 | 16.16 |
| P | 32.93 | 32.07 | 25.25 | 24.87 |
| O | 50.84 | 50.56 | 58.21 | 58.97 |

Supplementary Table 4 EDS analysis of Fe-P surface at different times

| Content (%) | 12h | 24h | 48h | 72h |
| --- | --- | --- | --- | --- |
| C | 12.43 | 14.63 | 11.38 | 9.08 |
| O | 41.58 | 38.58 | 41.23 | 41.31 |
| P | 14.79 | 13.73 | 13.8 | 14.57 |
| Fe | 31.2 | 33.06 | 33.59 | 35.05 |


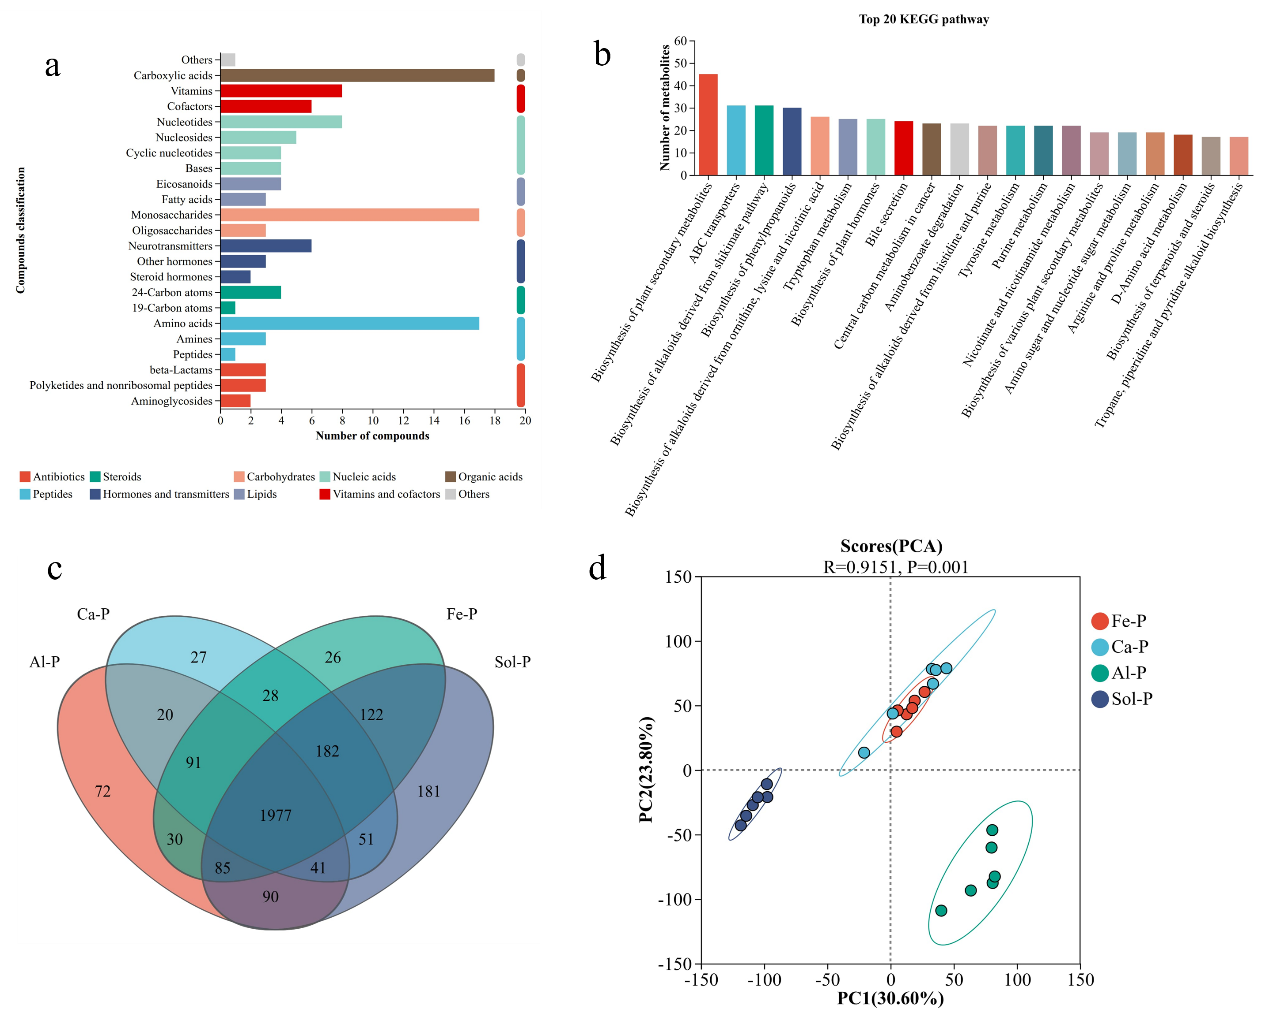


**Supplementary Fig. 1** Metabolite composition in different treatment (a) KEGG compound classification statistical chart, (b) top 20 KEGG pathway statistics, (c) Venn analysis of metabolites in different culture media, (d) PCA analysis of metabolites in different culture media.


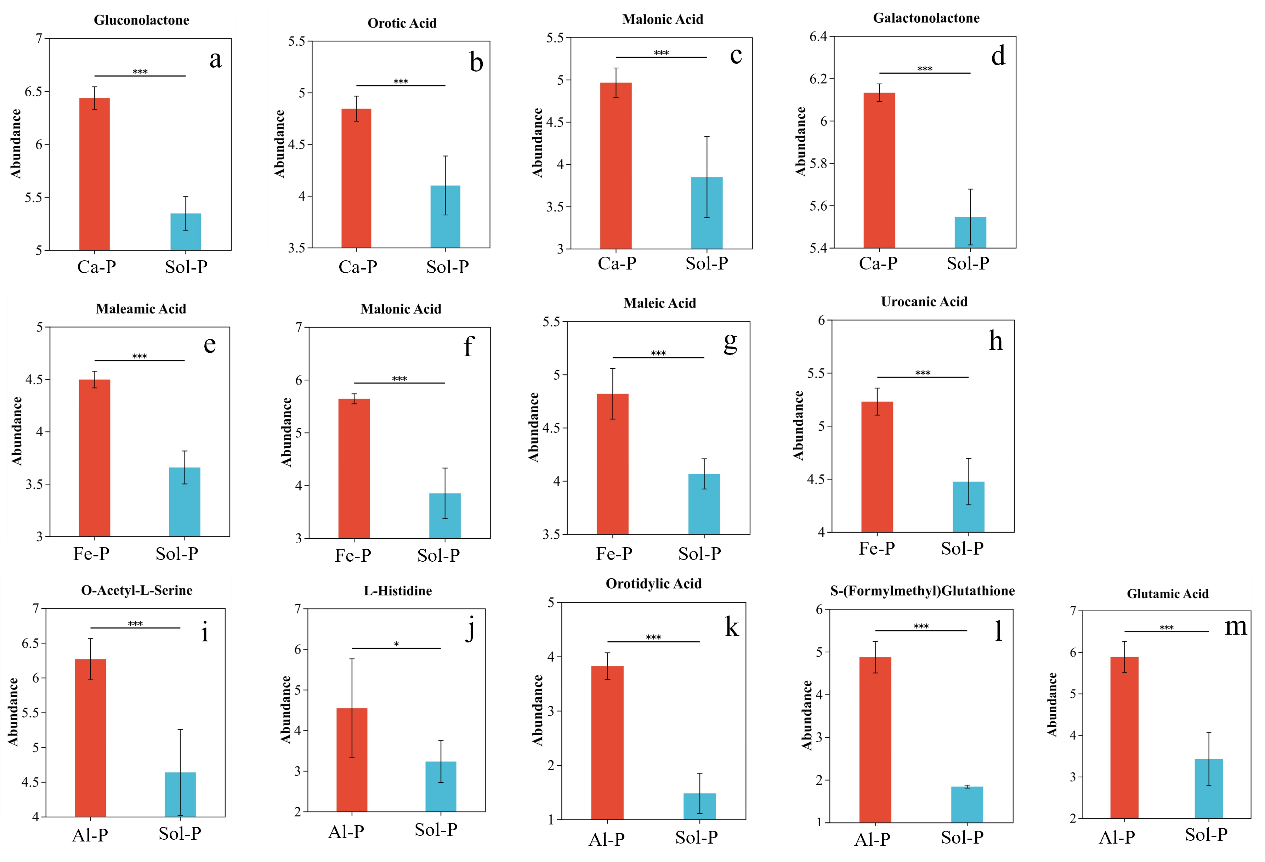


**Supplementary Fig. 2** The abundance of key organic acids under different insoluble phosphate treatments.
